# Supplementary material
Source: PubMed Central journal article supplement (PMC2651271)
Supplement: 0813224106_0813224106SI.pdf [file 0813224106_0813224106SI.pdf]

# Supporting Information

Maritan *et al.* 10.1073/pnas.0813224106

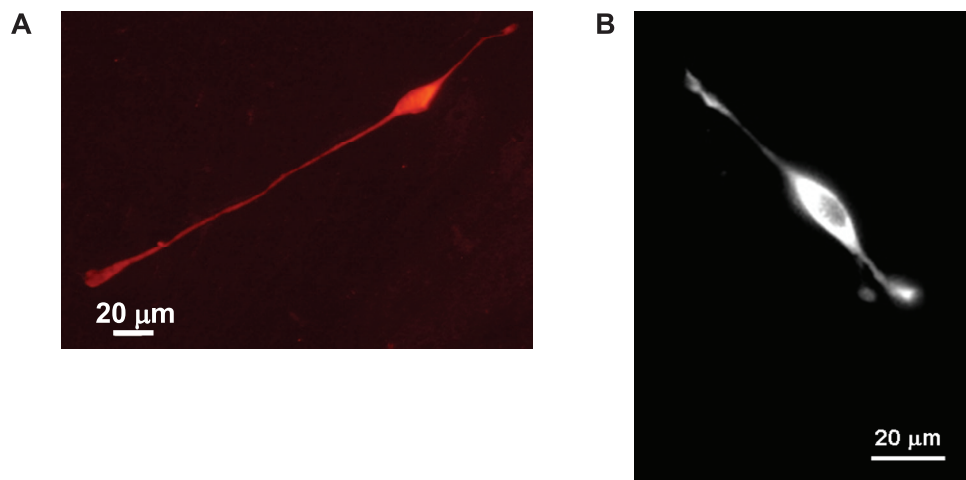

**Fig. 51.** Olfactory sensory neurons in culture. (A) Olfactory marker protein (OMP) immunofluorescence in an OSN in culture. *Upper right*, dendrite; *lower left*, axon. (B) An olfactory sensory neuron in culture transfected with the PKA based sensor for cAMP. The fluorescence is evenly distributed through the cytoplasm with the exclusion of the nucleus. *Upper left*, axon; *lower right*, dendrite.



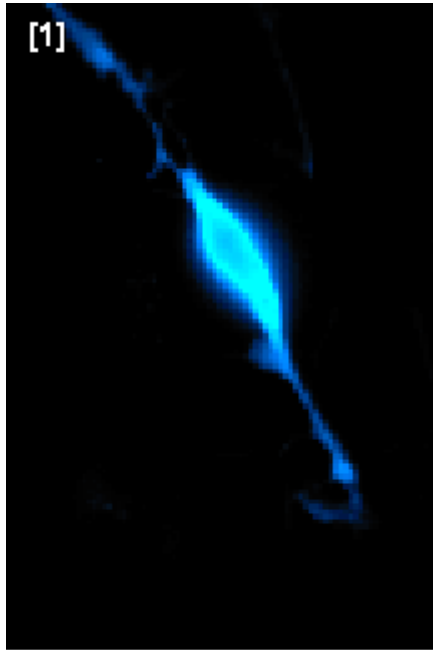

**Movie S1.** Sequence of pseudocolor images showing the fluorescence ratio changes (480 nm/545 nm) recorded in cilia-dendrite (*lower right*), soma, and axon terminus-growth cone (*upper left*) of an olfactory sensory neuron challenged with odors, bath applied.

[Movie S1 \(MOV\)](#)

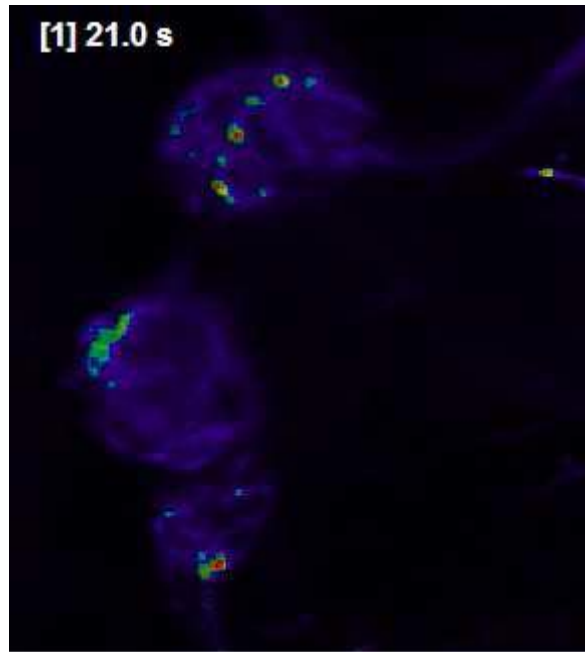

**Movie S2.** Sequence of pseudocolor images showing the change in fluorescence ( $\Delta F/F_0$ ) recorded in two glomeruli in hemi-head preparation, challenged with an odor puff focally applied.

[Movie S2 \(MOV\)](#)
